# Supplementary material
Source: PubMed Central journal article supplement (PMC6057614)

## **SUPPLEMENTAL MATERIAL**

### **Contemporary Epidemiology of Heart Failure in Fee-for-service Medicare Beneficiaries**

Rohan Khera MD, Ambarish Pandey MD, Colby Ayers MS, Vijay Agusala BS, Sandi Pruitt  
PhD, Ethan Halm MD MPH, Mark Drazner MD, Sandeep R. Das MD MPH, James A de Lemos  
MD, Jarett D. Berry MD MS

**eFigure 1:** Study selection flowsheet

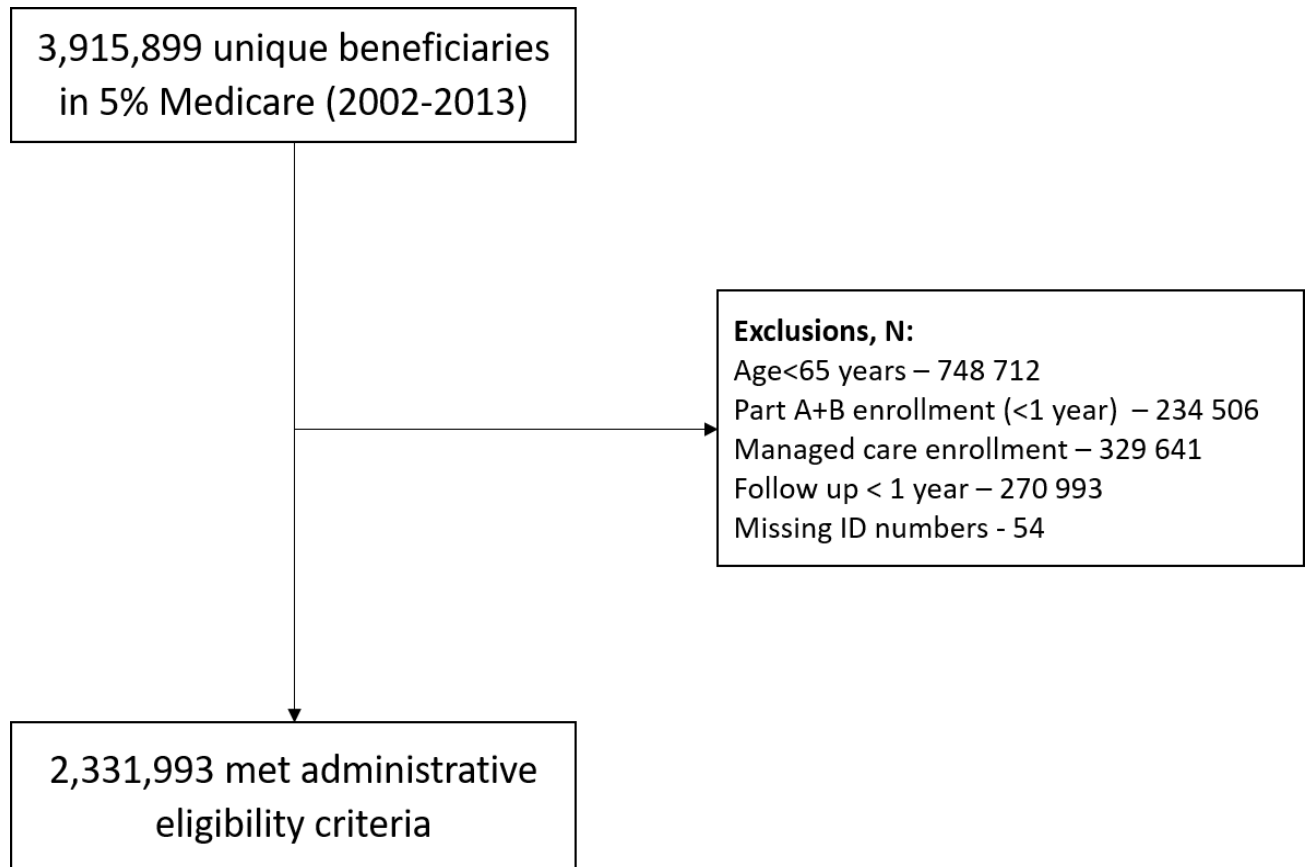

**eFigure 2:** Number of eligible Medicare beneficiaries in the denominator, by calendar year

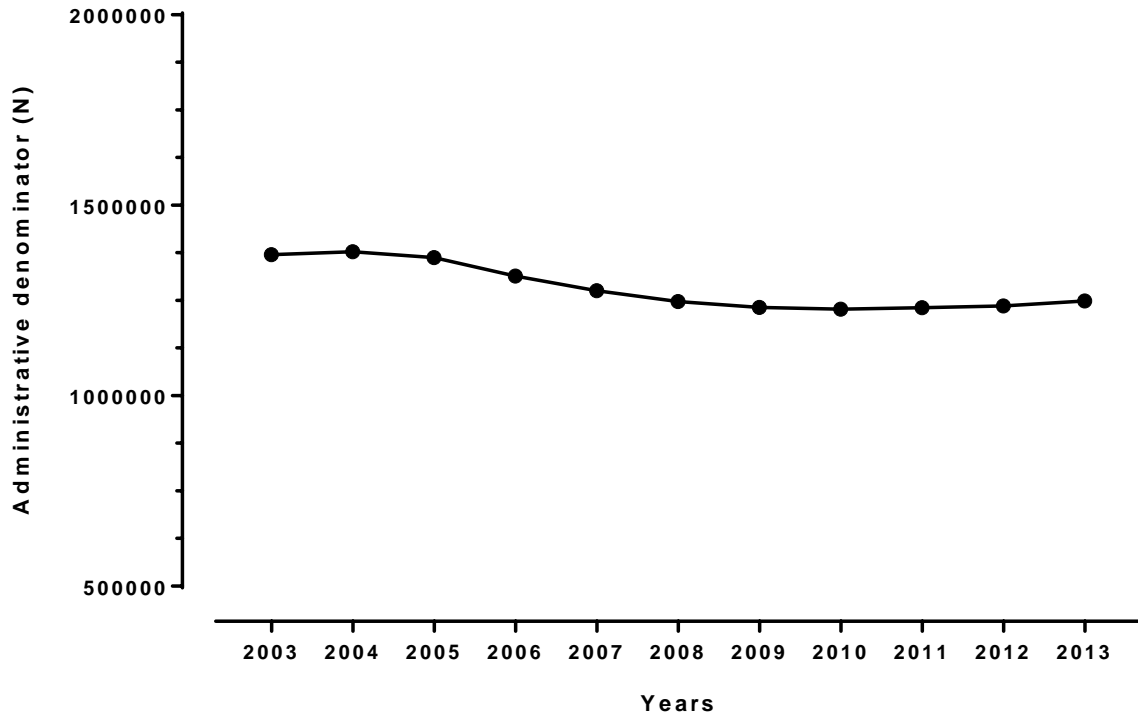

**eFigure 3:** Age-adjusted trends in heart failure incidence (overall)

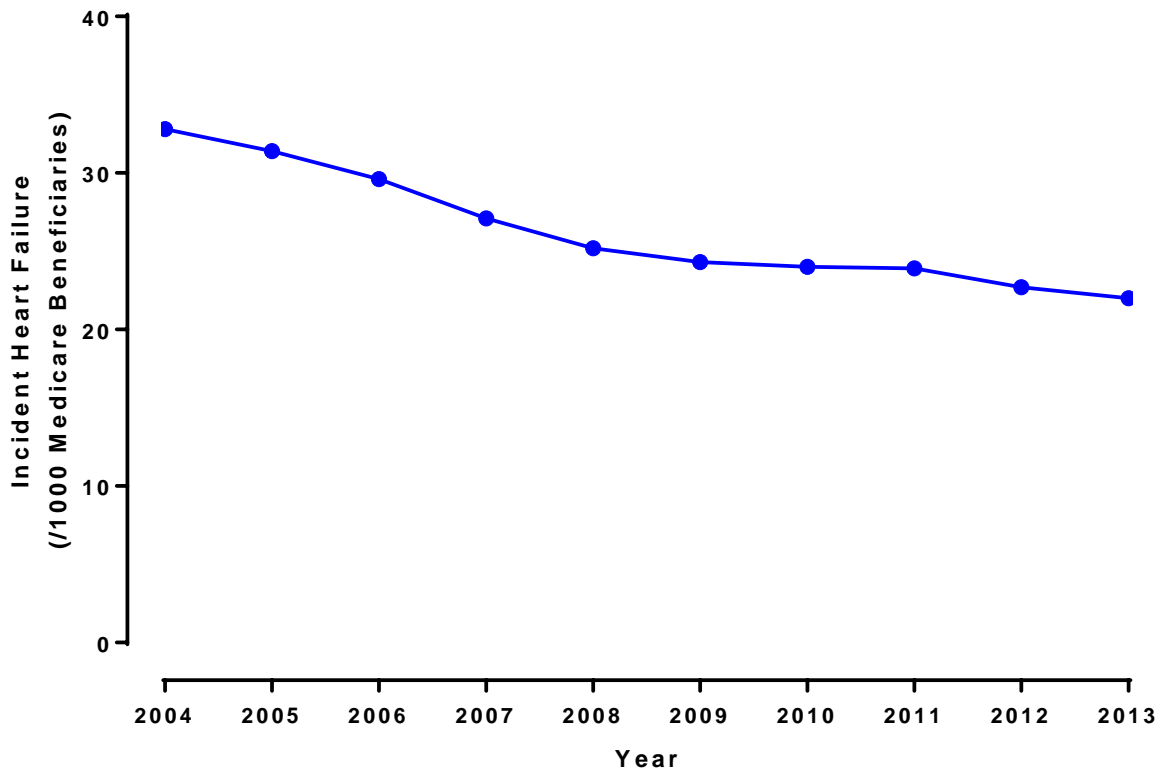

**eFigure 4:** Observed 1-year mortality rates in subgroups based on (A) age, (B) sex, (C) race/ethnicity, (D) U.S. census regions.

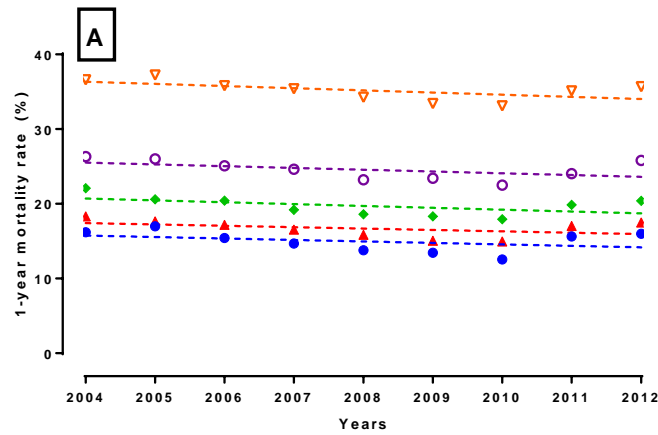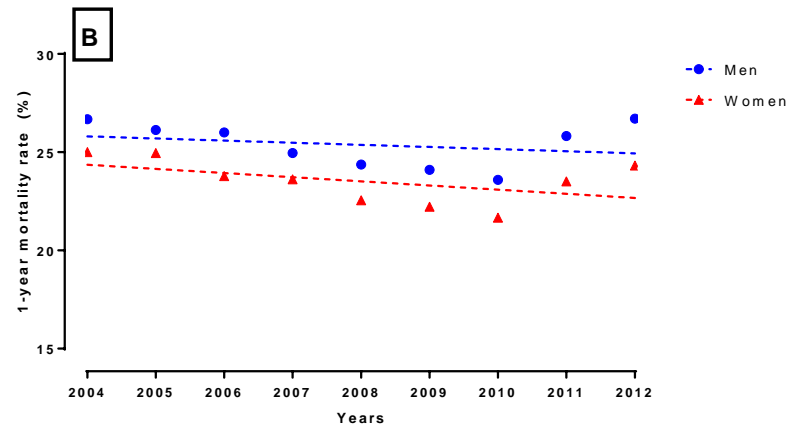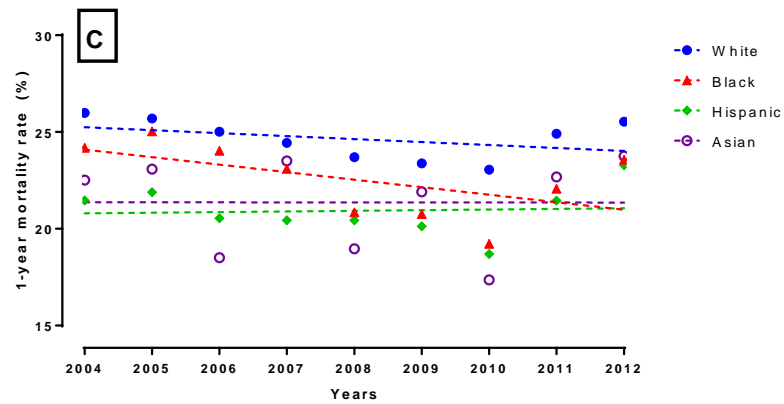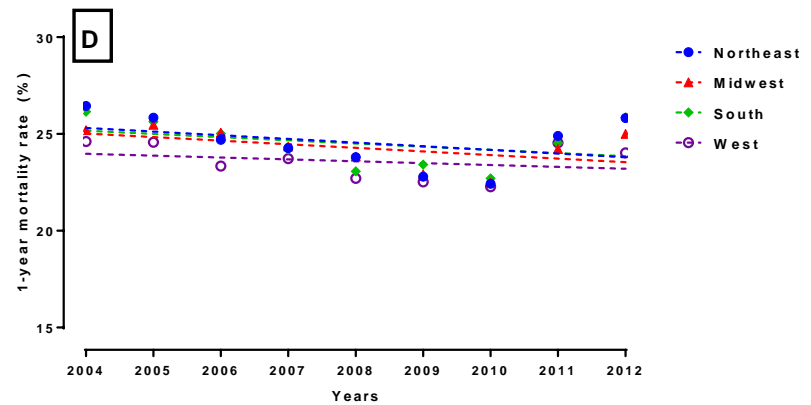

**eFigure 5:** Sensitivity analysis - trends in heart failure incidence with 2-year lookback period.

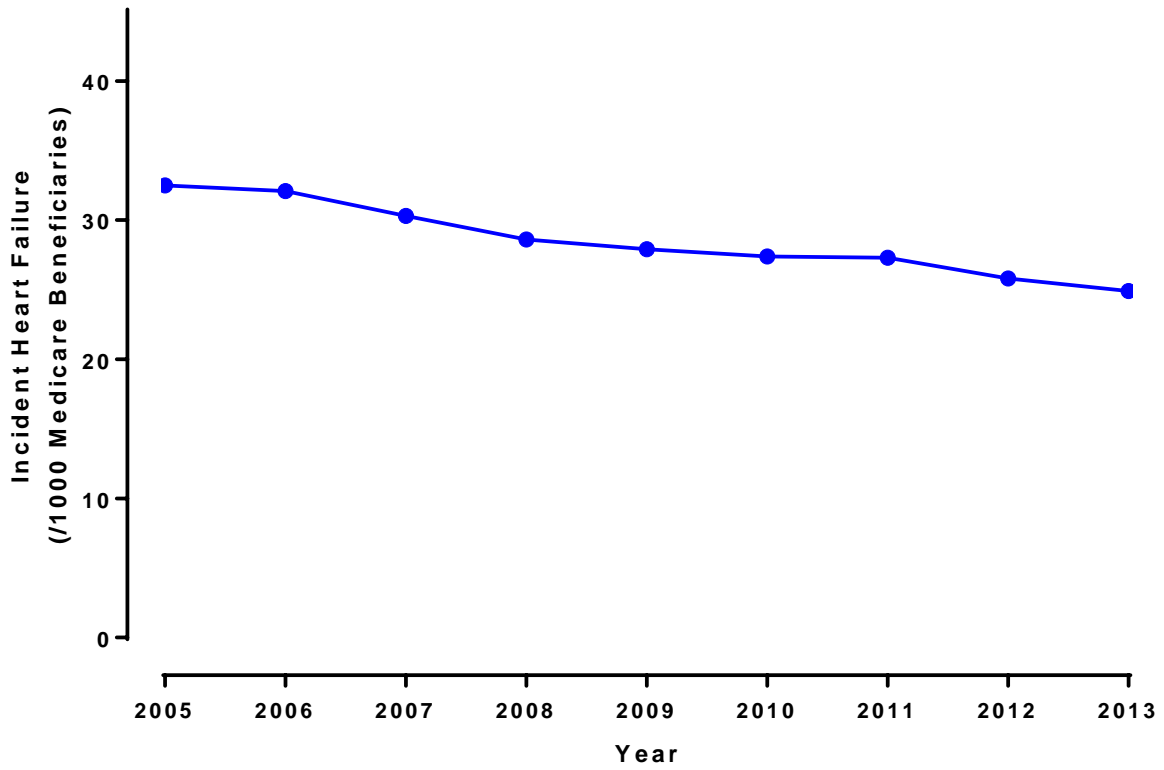

**eFigure 6:** Sensitivity analysis - trends in heart failure incidence with at least 1 hospitalization with heart failure required for heart failure diagnosis.

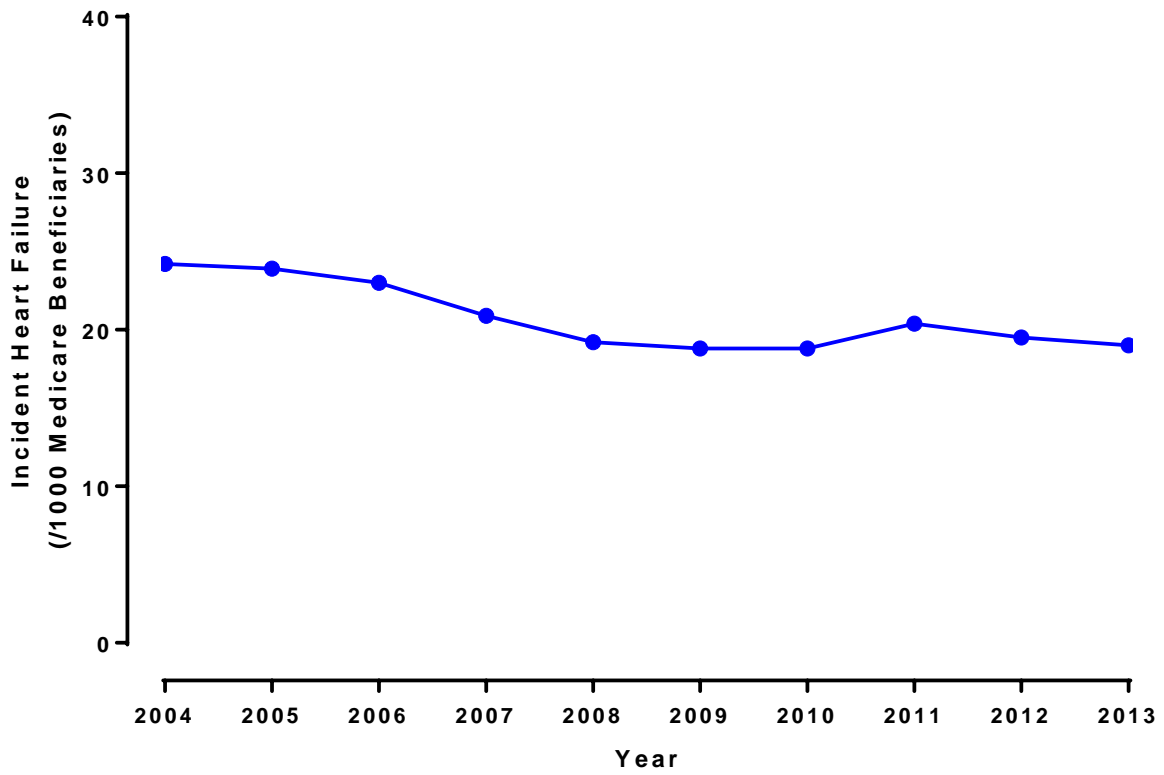

**eFigure 7:** Sensitivity analysis - trends in heart failure incidence with 1 inpatient or 1 outpatient encounter for heart failure diagnosis.

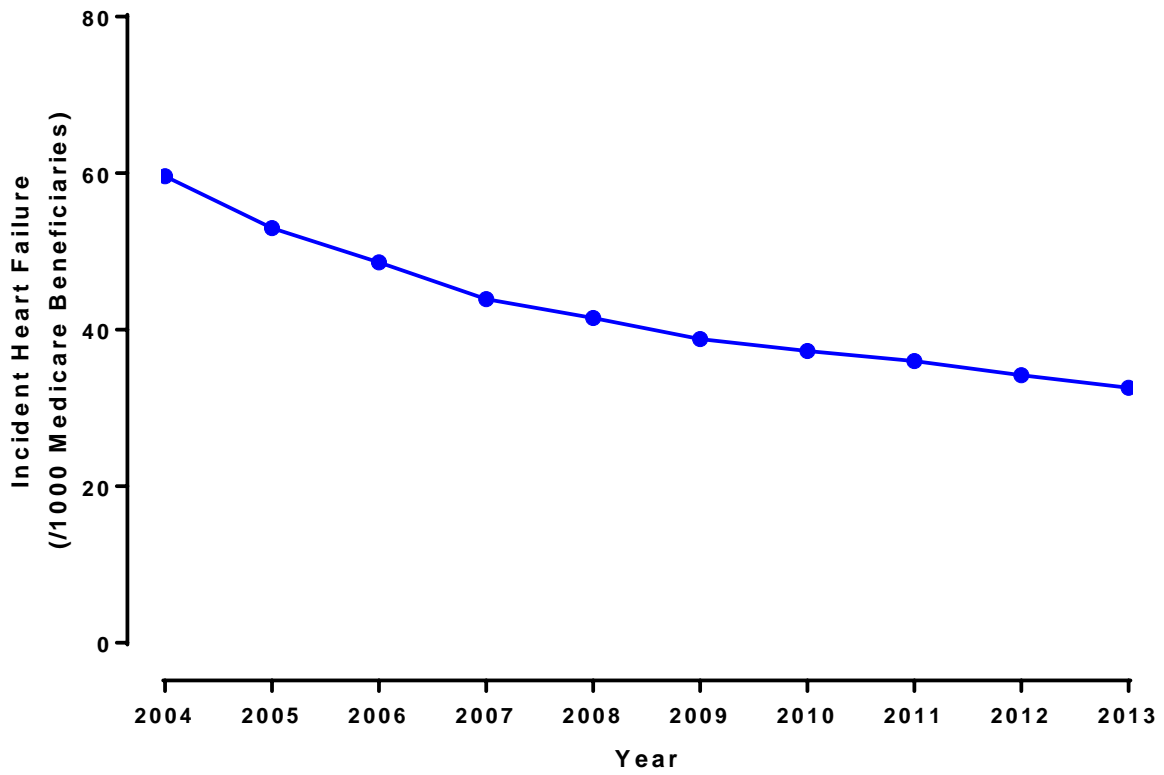



**eFigure 8:** Sensitivity analysis - trends in heart failure incidence with 1 inpatient or 3 outpatient encounters for heart failure diagnosis.

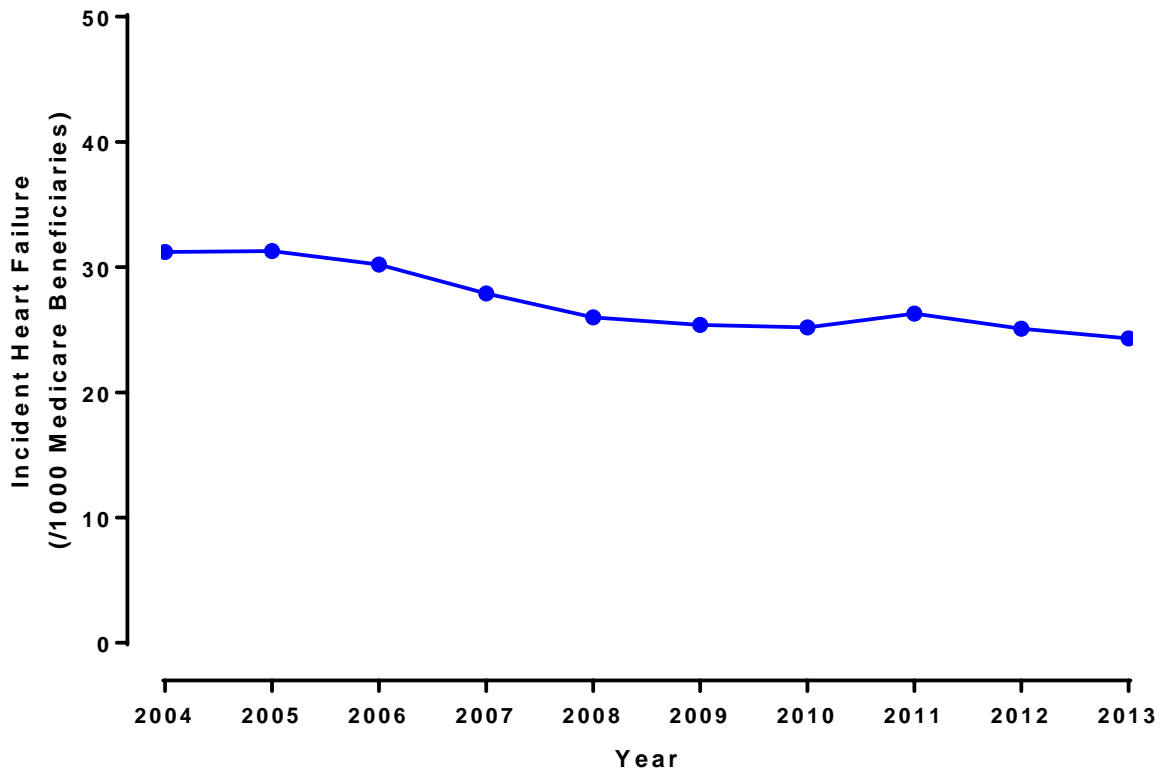

Supplement: NIHMS914271-supplement-Supplemental_Material.pdf [file NIHMS914271-supplement-Supplemental_Material.pdf]
